# Supplementary material for: The human ribosomal DNA array is composed of highly homogenized tandem clusters
Source: Genome Res. 2021 Nov;31(11):1971–82. doi: 10.1101/gr.275838.121 (PMC8559705; doi:10.1101/gr.275838.121)
Supplement: Supplemental Material [file supp_gr.275838.121_Supplemental_Table_S1.xlsx]

## Sheet: Sheet1
Table S1. Number of non-canonical rDNA copies in each sample
Sample name	# copies examined	# abnormal	# palindromic	# Sal box to Butterfly repeat duplication	# inversion of abnormal	# coding duplication of # abnormal	% abnormal	Description	Population name	Age	Sequencing method
A0031	866	11	2			7	1.27021	Werner syndrome patient fibroblast	Japanese	37	Cas9-enriched, in-house
A0031-iPS	773	1	1				0.129366	A0031-derived induced pluripotent stem cell	Japanese	37	Cas9-enriched, in-house
BSL2KA	619	15				10	2.42326	EBV-transformed B cell of a Bloom syndrome patient	Japanese	10	Cas9-enriched, in-house
PSCA0023	889	0					0	EBV-transformed B cell	Japanese	20s	Cas9-enriched, in-house
PSCA0047	1154	0	3				0	EBV-transformed B cell	Japanese	20s	Cas9-enriched, in-house
PSCA0060	652	0					0	EBV-transformed B cell	Japanese	70s	Cas9-enriched, in-house
PSCA0517	509	0	1				0	EBV-transformed B cell	Japanese	70s	Cas9-enriched, in-house
GM24143	4129.62	12	26			1	0.290584	EBV-transformed B cell	Ashkenazim	74	WGS, hpgp project
GM24149	3014.31	3	13				0.0995252	EBV-transformed B cell	Ashkenazim	90	WGS, hpgp project
GM24385	3654.72	1	11				0.0273618	EBV-transformed B cell	Ashkenazim	45	WGS, hpgp project
HG00438	2074.41	1	9				0.0482065	EBV-transformed B cell	Southern Han Chinese	unknown	WGS, hpgp project
HG00621	3403.02	7	19				0.205699	EBV-transformed B cell	Southern Han Chinese	unknown	WGS, hpgp project
HG00673	1521.65	3	10			2	0.197154	EBV-transformed B cell	Southern Han Chinese	unknown	WGS, hpgp project
HG00733	3236.33	3	19				0.0926976	EBV-transformed B cell	Puerto Rican	unknown	WGS, hpgp project
HG00735	1124.9	0	2				0	EBV-transformed B cell	Puerto Rican	unknown	WGS, hpgp project
HG00741	2196.36	12	11				0.546358	EBV-transformed B cell	Puerto Rican	unknown	WGS, hpgp project
HG01071	1936.73	1	17	1			0.0516333	EBV-transformed B cell	Puerto Rican	unknown	WGS, hpgp project
HG01106	1984.13	0	9				0	EBV-transformed B cell	Puerto Rican	unknown	WGS, hpgp project
HG01109	2756.58	5	19	14			0.181384	EBV-transformed B cell	Puerto Rican	unknown	WGS, hpgp project
HG01123	1769.29	5	3	8			0.282599	EBV-transformed B cell	Colombian	unknown	WGS, hpgp project
HG01175	1608.23	2	12				0.124361	EBV-transformed B cell	Puerto Rican	unknown	WGS, hpgp project
HG01243	2634.97	2	16		3		0.0759021	EBV-transformed B cell	Puerto Rican	unknown	WGS, hpgp project
HG01258	1433.94	0	5				0	EBV-transformed B cell	Colombian	unknown	WGS, hpgp project
HG01361	1825.5	5	3	60			0.273897	EBV-transformed B cell	Colombian	unknown	WGS, hpgp project
HG01891	1340.61	9	2		8		0.671338	EBV-transformed B cell	African Caribbean	unknown	WGS, hpgp project
HG01952	1893.21	0	15				0	EBV-transformed B cell	Peruvian	unknown	WGS, hpgp project
HG01978	2517.73	3	11				0.119155	EBV-transformed B cell	Peruvian	unknown	WGS, hpgp project
HG02055	1189.68	0	14				0	EBV-transformed B cell	African Caribbean	unknown	WGS, hpgp project
HG02080	2673.03	5	10	2			0.187053	EBV-transformed B cell	Kinh Vietnamese	unknown	WGS, hpgp project
HG02257	819.71	0	1				0	EBV-transformed B cell	African Caribbean	unknown	WGS, hpgp project
HG02486	1756.98	1	9	4			0.0569157	EBV-transformed B cell	African Caribbean	unknown	WGS, hpgp project
HG02559	1204.93	2	5				0.165985	EBV-transformed B cell	African Caribbean	unknown	WGS, hpgp project
HG02630	1979.54	3	4		2		0.151551	EBV-transformed B cell	Gambian Mandinka	unknown	WGS, hpgp project
HG02717	2127.52	0	11				0	EBV-transformed B cell	Gambian Mandinka	unknown	WGS, hpgp project
HG02723	3319.13	15	28				0.451926	EBV-transformed B cell	Gambian Mandinka	unknown	WGS, hpgp project
HG02886	3011.86	0	11				0	EBV-transformed B cell	Gambian Mandinka	unknown	WGS, hpgp project
HG03098	2596.9	1	15	1			0.0385074	EBV-transformed B cell	Mende	unknown	WGS, hpgp project
HG03471	2076.7	3	25			2	0.14446	EBV-transformed B cell	Mende	unknown	WGS, hpgp project
HG03516	1959.91	13	6	3			0.663295	EBV-transformed B cell	Esan	unknown	WGS, hpgp project
HG03540	1907.56	12	8	9		2	0.629077	EBV-transformed B cell	Gambian Mandinka	unknown	WGS, hpgp project
Summary	78141.7	156
