# Supplementary material for: The human ribosomal DNA array is composed of highly homogenized tandem clusters
Source: Genome Res. 2021 Nov;31(11):1971–82. doi: 10.1101/gr.275838.121 (PMC8559705; doi:10.1101/gr.275838.121)
Supplement: Supplemental Material [file supp_gr.275838.121_Supplemental_Table_S2.xlsx]

## Sheet: Sheet1
Table S2. Methylation in contiguous 45S rDNA and IGS
Pearson correlations were calculated between methylation levels of methylated 45S rDNA and contiguous IGS
Sample name	Mean methylation level of IGS contiguous methylated 45S rDNA	Mean methylation level of IGS contiguous unmethylated 45S rDNA	Pearson r	Pearson p value	False discovery rate
GM24143	0.523086	0.496825	0.431037	1.04272e-19	2.08543e-19
GM24149	0.496784	0.478696	0.467222	5.34654e-18	1.60396e-17
GM24385	0.528567	0.502549	0.170253	0.00116496	0.026794
HG00438	0.543681	0.508403	0.17701	0.0107264	0.289612
HG00621	0.523346	0.499194	0.397414	3.02817e-16	1.51409e-15
HG00673	0.505864	0.487096	0.302412	0.00190453	0.0457086
HG00733	0.48947	0.469054	0.307566	7.35717e-08	8.8286e-07
HG00735	0.508863	0.498744	0.237247	0.0514117	1.49094
HG00741	0.530404	0.512452	0.465058	2.28967e-13	1.83174e-12
HG01071	0.502687	0.472419	0.338232	3.41982e-06	5.12973e-05
HG01106	0.464712	0.429321	0.457044	2.04594e-10	2.04594e-09
HG01109	0.490843	0.482262	0.0976287	0.103676	3.31762
HG01123	0.535169	0.503632	0.279542	0.000138378	0.00290593
HG01175	0.520017	0.489356	0.235949	0.00388956	0.101129
HG01243	0.51567	0.495169	0.295218	1.17997e-05	0.000200595
HG01258	0.456974	0.393297	0.570721	1.2311e-11	1.10799e-10
HG01361	0.496202	0.467309	0.179247	0.083873	2.51619
HG01891	0.477442	0.447908	0.305631	0.00339637	0.0849092
HG01952	0.504273	0.477911	0.484629	7.94474e-14	5.56132e-13
HG01978	0.507757	0.465596	0.493332	7.31411e-17	2.92564e-16
HG02055	0.475184	0.448905	0.165638	0.103107	3.19632
HG02080	0.511037	0.49316	0.382809	1.3377e-07	1.73902e-06
HG02257	0.497333	0.476668	-0.0652138	0.810369	26.7422
HG02486	0.49412	0.468032	0.266705	0.000626448	0.0137819
HG02559	0.470093	0.450595	0.349276	4.33468e-05	0.00082359
HG02630	0.538522	0.512819	0.393875	9.01415e-15	5.40849e-14
HG02717	0.487094	0.456106	0.313784	1.64563e-08	1.8102e-07
HG02723	0.52843	0.49539	0.263442	1.06858e-05	0.000170973
HG02886	0.51954	0.486446	0.253027	4.88676e-07	6.84146e-06
HG03098	0.503194	0.46874	0.251029	0.0212644	0.595404
HG03471	0.529887	0.493357	0.265786	2.14147e-05	0.000385464
HG03516	0.520292	0.51099	0.280484	8.49071e-05	0.00169814
HG03540	0.443553	0.430513	0.676383	1.60543e-34	1.60543e-34
