# Supplementary material for: The human ribosomal DNA array is composed of highly homogenized tandem clusters
Source: Genome Res. 2021 Nov;31(11):1971–82. doi: 10.1101/gr.275838.121 (PMC8559705; doi:10.1101/gr.275838.121)
Supplement: Supplemental Material [file supp_gr.275838.121_Supplemental_Table_S3.xlsx]

## Sheet: Sheet1
Table S3. Frequency of contiguous rDNA copies with different methylation status
Sample name	# of pairs analyzed	# methylation status change	Percentage
GM24143	934	92	9.85011
GM24149	733	29	3.95634
GM24385	942	48	5.09554
HG00438	625	15	2.4
HG00621	1190	61	5.12605
HG00673	516	45	8.72093
HG00733	673	46	6.83507
HG00735	465	36	7.74194
HG00741	747	42	5.62249
HG01071	645	33	5.11628
HG01106	528	26	4.92424
HG01109	729	39	5.34979
HG01123	567	35	6.17284
HG01175	604	36	5.96026
HG01243	662	45	6.79758
HG01258	372	18	4.83871
HG01361	577	53	9.18544
HG01891	497	28	5.6338
HG01952	543	22	4.05157
HG01978	842	46	5.46318
HG02055	373	10	2.68097
HG02080	677	42	6.20384
HG02257	281	9	3.20285
HG02486	573	44	7.67888
HG02559	365	13	3.56164
HG02630	713	24	3.36606
HG02717	594	34	5.72391
HG02723	882	60	6.80272
HG02886	1047	40	3.82044
HG03098	517	26	5.02901
HG03471	664	34	5.12048
HG03516	693	39	5.62771
HG03540	556	18	3.23741
Summary	21326	1188	5.57066
